# Supplementary material for: Green method of synthesizing l-malate from d-glucose via CO2 fixation using an ATP-free in vitro synthetic enzymatic biosystem
Source: Royal Society of Chemistry journal article supplement (doi:10.1039/d4gc01799d), 2024-01-01
Supplement: d4gc01799d1.pdf [file d4gc01799d1.pdf]

## Supporting Information

### Green method of synthesizing L-malate from D-glucose via CO<sub>2</sub> fixation using an ATP-free *in vitro* synthetic enzymatic biosystem

Lin Fan<sup>1,2</sup>, Shangshang Sun<sup>2</sup>, Zhidan Zhang<sup>3</sup>, Yanmei Qin<sup>1</sup>, Peter Ruhdal Jensen<sup>4\*</sup>, Chun You<sup>1,2\*</sup>

<sup>1</sup> Tianjin Institute of Industrial Biotechnology, Chinese Academy of Sciences, Tianjin Airport

Economic Area, Tianjin, 300308, China

<sup>2</sup> University of Chinese Academy of Sciences Sino-Danish College, Beijing, China

<sup>3</sup> Key Laboratory of Systems Microbial Biotechnology, Tianjin Institute of Industrial

Biotechnology, Chinese Academy of Sciences, 300308 Tianjin, China.

<sup>4</sup> Microbial Biotechnology & Biorefining National Food Institute, Kemitorvet, 201, 213, 2800

Kgs. Lyngby, Denmark

\*Corresponding Authors:

Chun You, Tianjin Institute of Industrial Biotechnology, Chinese Academy of Sciences,  
Tianjin 300308, China. Email: you\_c@tib.cas.cn

Current address of Chun You: Institute of Bioengineering, College of Chemical and  
Biological Engineering, Zhejiang University, Hangzhou, 310027 Zhejiang, China, Email:  
cyou@zju.edu.cn.

Peter Ruhdal Jensen, Microbial Biotechnology & Biorefining National Food Institute,  
Kemitorvet, 201, 213, 2800 Kgs. Lyngby, Denmark. Email: perj@food.dtu.dk

## Table of Contents

|                                                     |          |
|-----------------------------------------------------|----------|
| <b>Table S1. Plasmids used in this study.....</b>   | <b>3</b> |
| <b>Fig S1. The HPLC profiles.....</b>               | <b>4</b> |
| <b>Fig S2. The standard curves.....</b>             | <b>4</b> |
| <b>Fig S3. SDS-PAGE gel.....</b>                    | <b>5</b> |
| <b>Fig S4. Biocatalytic efficiency of MDH.....</b>  | <b>5</b> |
| <b>Fig S5. The proof-of-concept experiment.....</b> | <b>6</b> |
| <b>Fig S6. LC-MS test.....</b>                      | <b>6</b> |

Table S1. Plasmids used in this study.

| Plasmid        | Features                                                                                                                                  | Ref |
|----------------|-------------------------------------------------------------------------------------------------------------------------------------------|-----|
| pET28a-ssgdh   | Kana <sup>R</sup> , <i>gdh</i> expression cassette containing GDH protein from <i>Sulfolobus solfataricus</i> , C-terminal 6×His tag      | 34  |
| pET28a-sackdga | Kana <sup>R</sup> , <i>kdga</i> expression cassette containing KDGA protein from <i>Sulfolobus acidocaldarius</i> , C-terminal 6×His tag  | 34  |
| pET28a-taaldh  | Kana <sup>R</sup> , <i>aldh</i> expression cassette containing ALDH protein from <i>Thermoplasma acidophilum</i> , C-terminal 6×His tag   | 34  |
| pET28a-pudhad  | Kana <sup>R</sup> , <i>dhad</i> expression cassette containing DHAD protein from <i>Paralcaligenes ureilyticus</i> , C-terminal 6×His tag | 37  |
| pET28a-tkmdh   | Kana <sup>R</sup> , <i>mdh</i> expression cassette containing MDH protein from <i>Thermococcus kodakarensis</i> , C-terminal 6×His tag    | 35  |

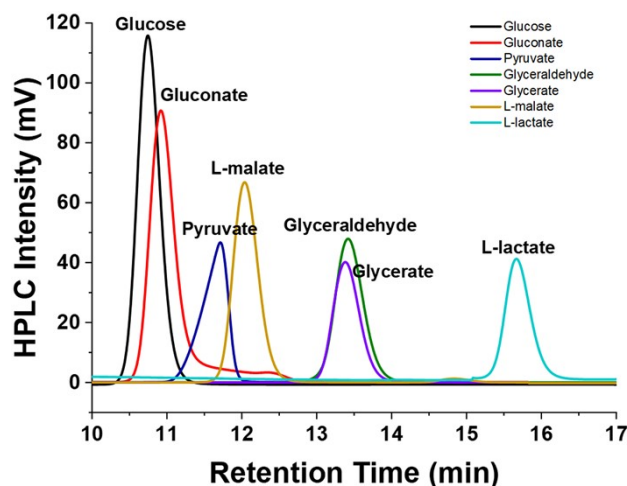

**Fig. S1** The High Performance Liquid Chromatography (HPLC) profiles of L-malate and other intermediates. Gluconate, pyruvate, glycerate, glyceraldehyde, and L-malate were measured by the HPLC (SHIMADZU, Japan) equipped with a refractive index detector. Samples were separated on a Bio-Rad Aminex HPLC organic acid column (HPX-87H 300 x 7.8 mm<sup>2</sup>) at 35 °C with a mobile phase of 5 mM H<sub>2</sub>SO<sub>4</sub> solution at a rate of 0.5 mL/min.

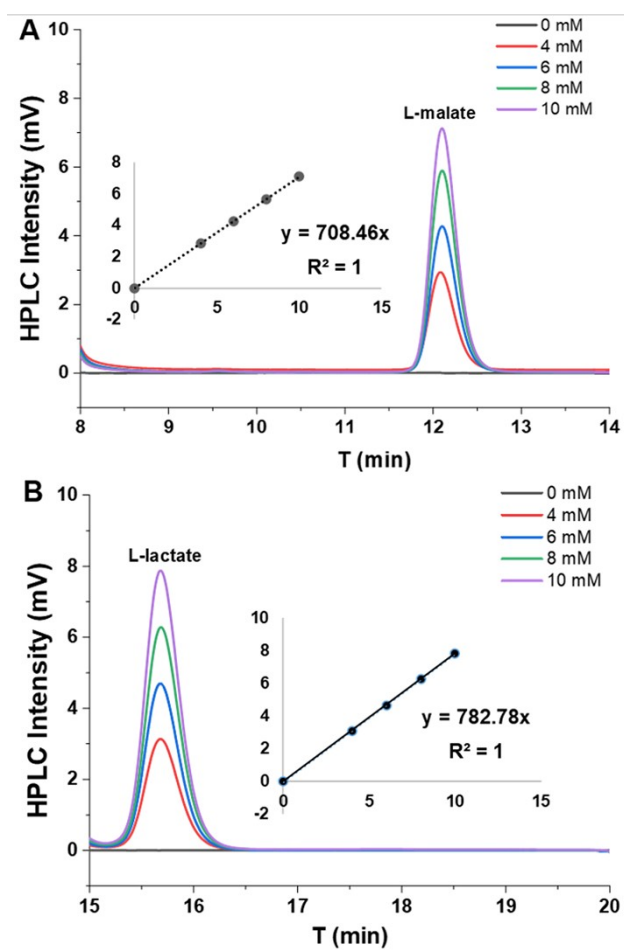

**Fig. S2** The standard curves of L-malate (A) and L-lactate (B). The concentration of L-malate and L-lactate from 4-10 mmol/L were determined from the height of the peaks in HPLC equipped with Bio-Rad HPX-87H column and a refractive index detector at 35 °C with a mobile phase of 5 mM

H<sub>2</sub>SO<sub>4</sub> solution at a rate of 0.5 mL/min.

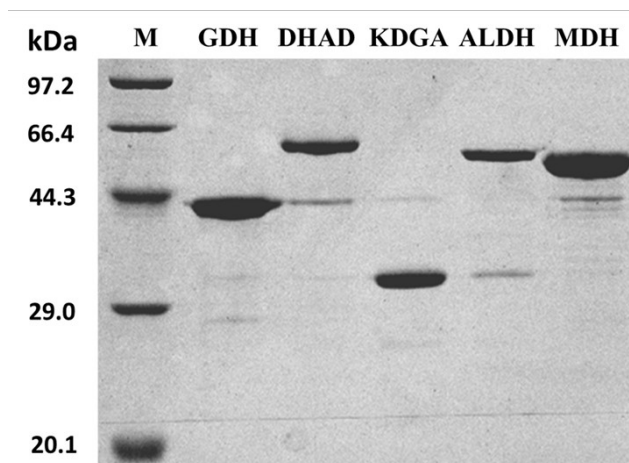

**Fig. S3** SDS-PAGE gel analysis of five recombinant enzymes for the one-pot biosynthesis of L-malate from D-glucose and CO<sub>2</sub>. M, protein marker. The molecular weights of GDH, DHAD, KDGA, ALDH, and MDH were approximately 41.7, 59.4, 32.5, 54.7, and 50.0 kDa, respectively.

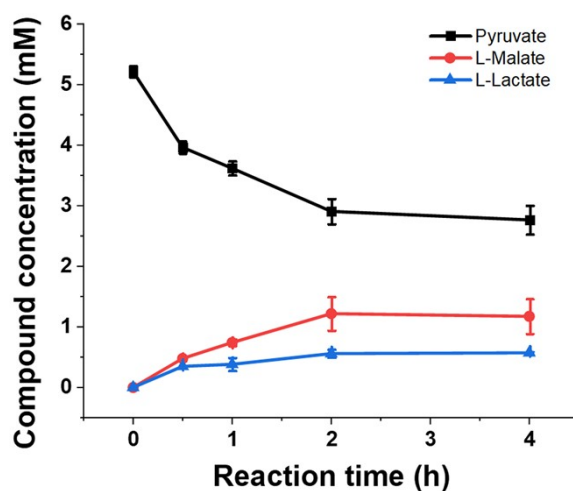

**Fig S4** Biocatalytic efficiency of MDH. The concentration profiles of pyruvate (square), L-malate (circle), and L-lactate (triangle). The reaction was performed at 50 °C in 500 mM HEPES-NaOH buffer (pH 7.0) containing 100 mM NaHCO<sub>3</sub>, 5.21 mM pyruvate, 0.5 mM MnCl<sub>2</sub>, 2 mmol/L DTT, 15 mmol/L NH<sub>4</sub>Cl, 0.01 g/L MDH, and 2.0 mM NADH. Values shown are means of triplicate determinations.

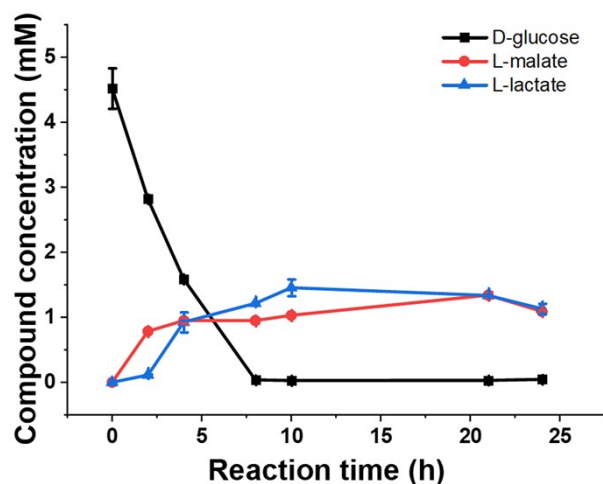

**Fig. S5** The proof-of-concept experiment for the production of L-malate from D-glucose via  $\text{HCO}_3^-$  fixation by an ivSEB in the aerobic state. The concentration profiles of D-glucose (square), L-malate (circle), and L-lactate (triangle). The reaction was performed at 50 °C in the aerobic state in 100 mM HEPES-NaOH buffer (pH 7.0) containing 100 mM  $\text{NaHCO}_3$ , 4.5 mM D-glucose, 5 mM  $\text{MgCl}_2$ , 0.5 mM  $\text{MnCl}_2$ , 2 mM DTT, 50 mM  $\text{NH}_4\text{Cl}$ , 1.0 U/mL GDH, 1.0 U/mL DHAD, 1.0 U/mL KDGA, 1.0 U/mL ALDH, 1.0 U/mL MDH, and 2.0 mM  $\text{NAD}^+$ . Values shown are means of triplicate determinations.

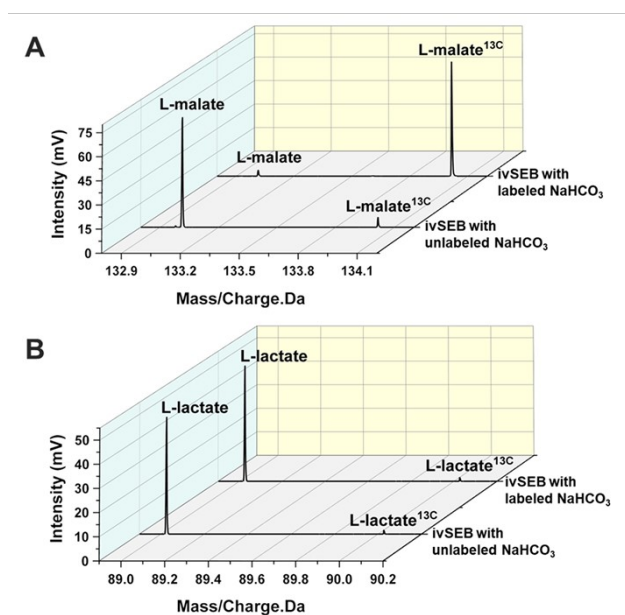

**Fig. S6** High performance liquid chromatography-mass spectrometry (LC-MS) test confirmed  $^{13}\text{C}$ -labeled products. (A) The LC-MS profiles of L-malate production from D-glucose with and without  $^{13}\text{C}$ -labeled. (B) The LC-MS profiles of L-lactate production from D-glucose with and without  $^{13}\text{C}$ -labeled. The reaction was performed in 100 mM HEPES-NaOH buffer (pH 7.0) at 50 °C containing 5 mM D-glucose, 100 mM  $\text{NaHCO}_3$ , 50 mM  $\text{NH}_4\text{Cl}$ , 2 mM DTT, 5 mM  $\text{MgCl}_2$ , 0.5 mM  $\text{Mn}^{2+}$ , 2.0 mM  $\text{NAD}^+$ , 1.0 U/mL GDH, 1.0 U/mL DHAD, 1.0 U/mL KDGA, 1.0 U/mL ALDH, and 1.0 U/mL MDH.
